# Supplementary material for: Mixed matrix membranes prepared from non-dried MOFs for CO2/CH4 separations
Source: Royal Society of Chemistry journal article supplement (doi:10.1039/c6ra23013j), 2016-01-01
Supplement: c6ra23013j1.pdf [file c6ra23013j1.pdf]

# Mixed Matrix Membranes Prepared from Non-Dried MOFs for CO<sub>2</sub>/CH<sub>4</sub> Separations

Aylin Kertik<sup>a</sup>, Asim L. Khan<sup>b</sup>, Ivo F.J. Vankelecom<sup>a\*</sup>

<sup>a</sup> *Center for Surface Chemistry and Catalysis, M<sup>2</sup>S, Faculty of Bioscience Engineering, KU Leuven, Leuven Chem&Tech, Postbus 2461, Celestijnenlaan 200F, 3001 Leuven, Belgium*

<sup>b</sup> *Department of Chemical Engineering COMSATS Institute of Information Technology Lahore, Pakistan*

\* [ivo.vankelecom@biw.kuleuven.be](mailto:ivo.vankelecom@biw.kuleuven.be)

Supplementary Information

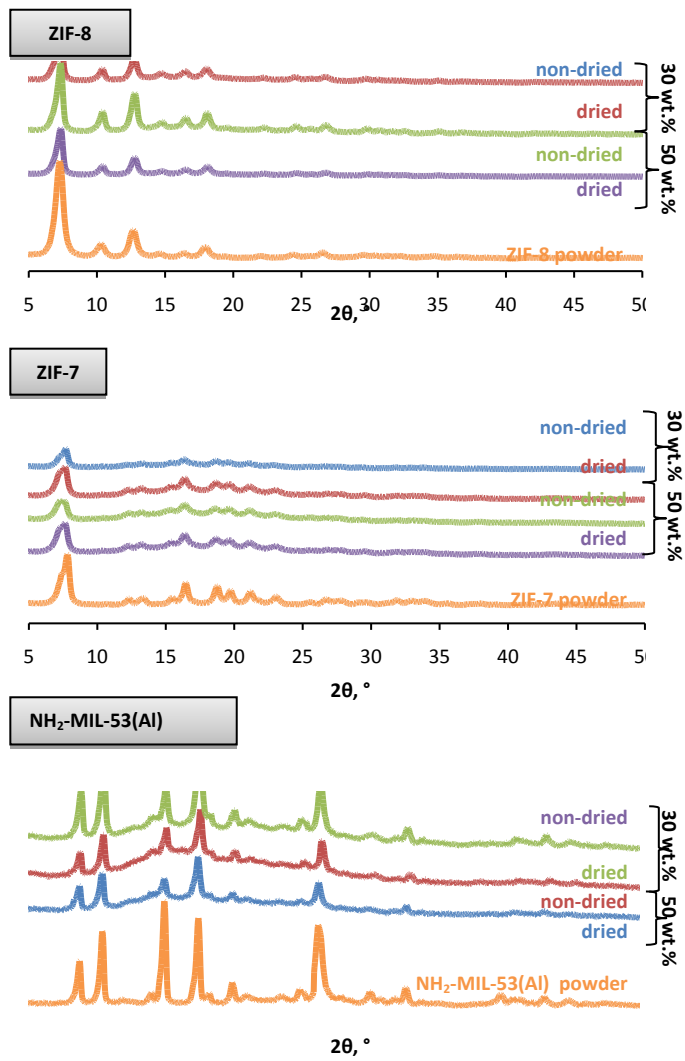

Fig. 1 XRD patterns of MMMs with non-dried and dried MOFs.

**Table 1. The gas separation measurements from this work.**

|                                           | MOF loading, wt.% | CO <sub>2</sub> permeability, Barrer | CO <sub>2</sub> /CH <sub>4</sub> selectivity |
|-------------------------------------------|-------------------|--------------------------------------|----------------------------------------------|
| Unfilled Matrimid®                        | 0                 | 5.6±0.7                              | 22.3±0.2                                     |
| ZIF-8 <sup>n-dr</sup>                     | 30                | 19.6±0.3                             | 18.6±0.2                                     |
| ZIF-8 <sup>dr</sup>                       | 30                | 55.7±1.4                             | 3.7±0.2                                      |
| ZIF-7 <sup>n-dr</sup>                     | 30                | 5.7±0.6                              | 26.8±1.3                                     |
| ZIF-7 <sup>dr</sup>                       | 30                | 15.9±1                               | 2.7±0.1                                      |
|                                           | 50                | 15.3±1.4                             | 3.23±0.1                                     |
| MIL-53(Al)NH <sub>2</sub> <sup>n-dr</sup> | 30                | 5.7±0.2                              | 24.5±0.6                                     |
| MIL-53(Al)NH <sub>2</sub> <sup>dr</sup>   | 30                | 29.9±2.4                             | 5.9±0.1                                      |
|                                           | 50                | 77.2±5.7                             | 1.6±0.1                                      |

**Table 2. Maxwell predictions for Matrimid®/ZIF-8 MMMs.**

| Loading, wt.% | CO <sub>2</sub> permeability, Barrer |                     |                      | CO <sub>2</sub> /CH <sub>4</sub> selectivity |                     |                      |
|---------------|--------------------------------------|---------------------|----------------------|----------------------------------------------|---------------------|----------------------|
|               | Ref. <sup>1*</sup>                   | Ref. <sup>2**</sup> | Ref. <sup>3***</sup> | Ref. <sup>1*</sup>                           | Ref. <sup>2**</sup> | Ref. <sup>3***</sup> |
| 10            | 7.8                                  | 10.8                | 10.9                 | 26.8                                         | 34.9                | 35.0                 |
| 20            | 7.5                                  | 14.3                | 14.4                 | 20.7                                         | 34.7                | 34.9                 |
| 30            | 7.2                                  | 18.7                | 18.8                 | 16.2                                         | 34.6                | 34.8                 |
| 40            | 6.9                                  | 24.5                | 24.8                 | 12.6                                         | 34.4                | 34.8                 |
| 50            | 6.7                                  | 32.5                | 33.1                 | 9.9                                          | 34.1                | 34.6                 |
| 60            | 6.4                                  | 44.4                | 45.4                 | 7.7                                          | 33.8                | 34.5                 |
| 70            | 6.2                                  | 63.6                | 65.7                 | 5.9                                          | 33.2                | 34.2                 |
| 80            | 6.0                                  | 100.1               | 105.3                | 4.4                                          | 32.2                | 33.8                 |
| 90            | 5.7                                  | 196.8               | 217.2                | 3.2                                          | 29.6                | 32.4                 |
| 100           | 5.5                                  | 1192.0              | 2658.0               | 2.2                                          | 2.8                 | 3.3                  |

\* ZIF-8 membrane at 2 atm feed pressure and 308 K, pure gas measurements

\*\* ZIF-8 membrane at 1.1-2 bar feed pressure and 298 K, pure gas measurements

\*\*\*ZIF-8 membrane at 1 bar feed pressure and 298 K, pure gas measurements

**Table 3. Maxwell predictions for Matrimid®/ZIF-7 MMMs.**

| Loading, wt.% | CO <sub>2</sub> permeability, Barrer |                     | CO <sub>2</sub> /CH <sub>4</sub> selectivity |                     |
|---------------|--------------------------------------|---------------------|----------------------------------------------|---------------------|
|               | Ref. <sup>4*</sup>                   | Ref. <sup>5**</sup> | Ref. <sup>4*</sup>                           | Ref. <sup>5**</sup> |
| 10            | 8.8                                  | 9.5                 | 30.1                                         | 32.1                |
| 20            | 9.7                                  | 11.1                | 25.9                                         | 29.5                |
| 30            | 10.6                                 | 13.0                | 22.4                                         | 27.1                |
| 40            | 11.6                                 | 15.3                | 19.2                                         | 24.7                |
| 50            | 12.7                                 | 18.0                | 16.2                                         | 22.2                |
| 60            | 14.0                                 | 21.4                | 13.3                                         | 19.5                |
| 70            | 15.4                                 | 25.6                | 10.4                                         | 16.3                |
| 80            | 17.0                                 | 31.1                | 7.5                                          | 12.5                |
| 90            | 18.9                                 | 38.5                | 4.4                                          | 7.6                 |
| 100           | 21.0                                 | 49.0                | 1.1                                          | 0.9                 |

\* ZIF-7 membrane at 1 bar feed pressure and 473 K, pure gas measurements

\*\* ZIF-7 membrane at 1 bar feed pressure and 493 K, pure gas measurements

**Table 4. Maxwell predictions for Matrimid®/MIL-53(Al)NH<sub>2</sub> MMMs.**

| Loading, wt.% | CO <sub>2</sub> permeability, Barrer |                     | CO <sub>2</sub> /CH <sub>4</sub> selectivity |                     |
|---------------|--------------------------------------|---------------------|----------------------------------------------|---------------------|
|               | Ref. <sup>6*</sup>                   | Ref. <sup>7**</sup> | Ref. <sup>6*</sup>                           | Ref. <sup>7**</sup> |
| 10            | 8.6                                  | 9.9                 | 41.2                                         | 34.6                |
| 20            | 9.2                                  | 12.2                | 48.6                                         | 34.1                |
| 30            | 9.9                                  | 14.9                | 57.7                                         | 33.7                |
| 40            | 10.6                                 | 18.2                | 68.9                                         | 33.2                |
| 50            | 11.3                                 | 22.3                | 83.0                                         | 32.7                |
| 60            | 12.1                                 | 27.7                | 101.1                                        | 32.0                |
| 70            | 13.0                                 | 35.1                | 124.7                                        | 31.2                |
| 80            | 13.9                                 | 45.5                | 156.5                                        | 30.1                |
| 90            | 14.9                                 | 61.7                | 201.1                                        | 28.5                |
| 100           | 16.0                                 | 90.0                | 266.7                                        | 25.7                |

\* Back-calculated from MMM data at 5 bar and 298 K, pure gas measurements

\*\* Back-calculated from MMM data at 10.3 bar and 308 K, pure gas measurements

## References

- 1 O. Shekhah, R. Swaidan, Y. Belmabkhout, M. du Plessis, T. Jacobs, L. J. Barbour, I. Pinnau and M. Eddaoudi, *Chem. Commun.*, 2014, **50**, 2089–2092.
- 2 H. Bux, F. Liang, Y. Li, J. Cravillon, M. Wiebcke and J. Caro, *J. Am. Chem. Soc.*, 2009, **131**, 16000–16001.
- 3 M. C. McCarthy, V. Varela-Guerrero, G. V Barnett and H.-K. Jeong, *Langmuir*, 2010, **26**, 14636–14641.
- 4 Y.-S. Li, F.-Y. Liang, H. Bux, A. Feldhoff, W.-S. Yang and J. Caro, *Angew. Chemie Int. Ed.*, 2010, **49**, 548–551.
- 5 Y. Li, F. Liang, H. Bux, W. Yang and J. Caro, *J. Memb. Sci.*, 2010, **354**, 48–54.
- 6 E. Ahmadi Feijani, A. Tavasoli and H. Mahdavi, *Ind. Eng. Chem. Res.*, 2015, **54**, 12124–12134.
- 7 X. Y. Chen, V.-T. Hoang, D. Rodrigue and S. Kaliaguine, *RSC Adv.*, 2013, **3**, 24266.
